# Supplementary material
Source: PubMed Central journal article supplement (PMC3486022)
Supplement: EC.00255-12_zek999093994so1.pdf [file EC.00255-12_zek999093994so1.pdf]

```

Afu 1 -----MMADKSKLVTPLKKTLENDLNDRLSLSAQKTERLLRLREYGTNPSNAGLI
Ani 1 -----MDLRILQCESEKIQVAKLINSLEKDIKDNLSLSAQRTQI LLQLRQYGTSPDNAGSI
Pch 1 -----MAPLQMGCEPAKIQVAVLQKLSLEEDQENNLSLADRIQT LLQLRQHGTMETNAEPI
Ptr 1 -----MSQKCEPAKIQVAVLQKLSLEKADLQAKQLSEORRKLLEQLKVVGRLVDMSDPI
Ncr 1 -----MASIQWCEPAKIQVAVLQKLSLEKADLQAKQLSEORRKLLEQLKVVGRLVDMSDPI
Gze 1 MATLPPAGLFGTDRKLEYKRLINDLSSEDI NEELYLPDDRAAVLDQLKILTRDPIINADPL

Afu 51 VSEWGMKILCRYGVEGETEDVRRRAALRCVANALLLDKMRQIFADTGYGSKLAEMLKCDN
Ani 57 VSKKGIELSKRYGIDGETTDVREAAALRCVANALLLDNMRQLFVDTGKGGRLAEMLKCDSD
Pch 57 YSQNGINTLMRYGVEGETEDVRRRAALRCVANALLLDPKMROAFVDTGYSGKLAEKLKTED
Ptr 55 FTEDGERTLGRCAFDEGETTPASQELRCVANALLLPKTRQIFVLDLGHGPHAAEKLKSDS
Ncr 55 FTKQGIETLTKHAFDGPSETTSPALAVLGNAMLLIPETRQRQFVLDLGYESKACEKLNNDN
Gze 61 YTEKGIETLTKHAYDKPSTKKSADAAARVLANAMVLLKTVTTRDIFVYKKGFAFNACQGLNGGS

Afu 111 SEDEMVISRILFLCTYDTHDYZEQLIKNHSLGDNVNYQIIRHAKQFPKSGRKP----LVQ
Ani 117 SEHEMVISRILFLSTYDTHNFDLIDLINNHSLGDNVNYQILRHASKQFPKSGRKP----LSQ
Pch 117 SEDEMVISRILFYATYNTLDEKDLIKSHALGDNVNYQILRHAKQFPKSGRKP----LSQ
Ptr 115 IDEFLAARVLFYNTYDANLDYAOIQRONQLADSIINAARHAKQFPKSGRKPSPQHTQP
Ncr 117 WDEFLAARVLFYNTYDANLDYAOIQRONQLADSIINAARHAKQFPKSGRKPSPQHTQP
Gze 121 FEDEFINSRILFLSTYGRVLDLKKLIDDERGLADRISENLARHAK-----ESKAK----SDP

Afu 167 IDEHALFTDLKLVFNVSKVYVVDLSATFSPSIPYIFKIIISRIDIP----PKPLDGLLGYLL
Ani 173 VDEHALFTDLKLVFNVSKVYVVDLSATFSPSIPYIFKIIISRIDIP----LKPLDGLLGLTLL
Pch 173 MDEHALSDTLKLVFNVSKVYVVDLSATFSPSIPYIFKIIISRIDIP----AKPLDGLVGGLL
Ptr 175 HELMALSETLKLNVNVIHFHKLQSLPFTSIPNVFRMLVSRNPS----SPPLATPTRELV
Ncr 175 HELMALGETLKLNVNVIHFKQSKLDCFTAAVPHIVTLLSLDIPPPKGTBPPLSPPLSLV
Gze 173 HQDMALVESAKILFRVITYCPKESSTSAIPHVLVALLLKQDIS----QTKPLDPPVGFII

Afu 223 NCLSTLDLENKGFHFESPIFPFNFQNCNVDKLINILDOAVSAYDAQDLATKAIPLLHT
Ani 229 NCLSTLDLENKGFHFESPIFPFNFQNCNVDKLINILDOAVSAYEFSLETKAIPLFHT
Pch 229 NTLSTLDLENKGFHFESPIFPFNFQNCNVDKLVSILOQATSIYSPTELEANAVPLLYS
Ptr 231 NALLHLDLEDPGQ----KAVFPPFDNVNITCLVTLTLLKAIIVYPPKELDDTITPVITL
Ncr 235 NALMNLRLDSEEAR----CLYPKDAPSSSLAEKLTLLDLSLKAYSDDQELDATVTPIVCI
Gze 230 NALANLLVGSSDCQ----KSHPEEEDPEKVVSRSLISILDAAMKNVDPNQLDATVSPLLGV

Afu 283 LVTIYEVAPDGP--RKYMQWLLLPEDSDRKPPIGKSDTLSSKLLRLSTTFYQN-LKIAIS
Ani 289 LVTIYEVAPDGP--RKYMQWLLLPEDDNRDRPIGQSDTLSSKLLRLSTMHYAN-LKVAIS
Pch 289 LIAYIEVAPDGP--RKYMQWLLLPEDDTRSLPIGQSDTLSSKLLRLSTTHFAN-LKVTIS
Ptr 287 LRRYIEVAPDGP--KQTKQTLLEPDAERDKPIGKSDTLSSKLLRLSTALTPTLRGSAIA
Ncr 291 ISSIYENASDPPVDEIRKSLPSEERNKVILGKGDTLPAKLLANMNTPIAPEFARVAIS
Gze 286 ISSVYKHAPESS--RKYIREKLLPTEEDRKEVILGKGDALSAKLLQNFNNELAPSVGTVIQ

Afu 340 EIMNFVLSGKDAE NLTKNIGYGFAAGL LASRGLPIPIQSAS-----EAFATNSNSFDPEINP
Ani 346 EIMNFVLSGKDAE NLTKNIGYGFAAGL LASRGMIPKSA-----EAFATNSQDLNPEINP
Pch 346 EIMNFVLSGKDAE NLTKNIGYGFAAGL LAARGTEMPQSA-----EASSAK-DGPDARNP
Ptr 345 SMLLELSQKIPATFVFNIGYGFAAGL ILSNNIEMPDDEVV-----KANAGKIDEAIPVNP
Ncr 351 HLLNWSLKDANKFVFNIGYGFAAGL IFQNNIIPVBEGLGGDAEKGSQAGQSSRRVNP
Gze 344 HLLYLDLSENDANKFVFNIGYGFAAGL IFQNNIIPVBEGLGGDAEKGSQAGQSSRRVNP

Afu 395 ITGORWDAEKQDTGPPMRSEKEREAEERL FVLFERAKANGCLGNVENPVROAVESGRFEEL
Ani 401 ITGORWDAEKQDTGPPMRSEKEREAEERL FVLFERAKANGCLGNVENPVTOALREGRFEEL
Pch 400 ITGORWDAEKQDTGPPMRSEKEREAEERL FVLFERAKANGCLGNVENPVTOALREGRFEEL
Ptr 400 ITGORWDAEKQDTGPPMRSEKEREAEERL FVLFERAKANGCLGNVENPVTOALREGRFEEL
Ncr 411 ITGCFLDRETFVQTEPMQSEKEREAEERL FVLFERAKANGCLGNVENPVAKAVCEGRFEEL
Gze 393 VTGCHVDAEKQDTGPPMRSEKEREAEERL FVLFERAKANGCLGNVENPVTOALREGRFEEL

Afu 455 PDSDESD--
Ani 461 PDSDESD--
Pch 460 PDDDESD--
Ptr 460 DDDDESD--
Ncr 471 PDDVEEDSD
Gze 453 RDDVEEIE

```

**FIG S1** Alignment of RicA-like proteins in *A. fumigatus* (Afu), *A. nidulans* (Ani), *Penicillium chrysogenum* (Pch), *Pyrenophora tritici* (Ptr), *Neurospora crassa* (Ncr) and *Gibberella zeae* (Gze). ClustalW (<http://align.genome.jp/>) and BoxShade 3.21 ([http://www.ch.embnet.org/software/BOX\\_form.html](http://www.ch.embnet.org/software/BOX_form.html)) were used for the alignment and presentation.

**Table S1.** Oligonucleotides used in this study

| Name    | SEQUENCE (5'→3')                                   | Purpose                                     |
|---------|----------------------------------------------------|---------------------------------------------|
| oNK-393 | ATATGAATTCATGGATTTGCGTATTCTGCAGGGC                 | 5' <i>Anr</i> A with <i>Eco</i> RI          |
| oNK-394 | ATATGCGGCCGCTTCACTATCAGAGTCAGGCAACTC               | 3' <i>Anr</i> A with <i>Not</i> I           |
| oNK-521 | ATATGGATCCTTATTCACTATCAGAGTCAGGCAAC                | 3' <i>Anr</i> A with <i>Bam</i> HI          |
| oNK-507 | ATATGGATCCTAATGGGTTGTGGAATGAGTACCGAG               | 5' <i>Anf</i> adA with <i>Bam</i> HI        |
| oNK-508 | ATATCTCGAGTTAAATCAGACCACAGAGTCTCAG                 | 3' <i>Anf</i> adA with <i>Xho</i> I         |
| oNK-509 | ATATGGATCCTAATGGGTTGTATGAGCTCAAAGCAG               | 5' <i>Ang</i> anA with <i>Bam</i> HI        |
| oNK-510 | ATATCTCGAGTTAGAGTATGAGCGTGTGGAGATTC                | 3' <i>Ang</i> anA with <i>Xho</i> I         |
| oNK-511 | ATATGAATTCATGGGGTCGTGTTTCAGTTCAGAA                 | 5' <i>Ang</i> anB with <i>Eco</i> RI        |
| oNK-512 | ATATGTCGACTTACAGGATCCCCGAGTCTTTCAA                 | 5' <i>Ang</i> anB with <i>Sal</i> I         |
| oNK-352 | TAGTGCTTGGATGACAAGGTTTGT                           | 5' flanking region of <i>Anr</i> icA        |
| oNK-353 | GCTTTGGCCTGTATCATGACTTCA AGAATACGCAAATCCATATTCACTC | 3' <i>Anr</i> icA with <i>Afpyr</i> G tail  |
| oNK-354 | ATCGACCGAACCTAGGTAGGGTA AGAGCATCTATGGCAGAACATGAG   | 5' <i>Anr</i> icA with <i>Afpyr</i> G tail  |
| oNK-355 | ACCTACATACTGCGTATGTCTGCTG                          | 3' flanking region of <i>Anr</i> icA        |
| oNK-474 | ACTTCTGCAGTCGGAATTGGCCTG AGAATACGCAAATCCATATTCACTC | 3' <i>Anr</i> icA with <i>Anpyr</i> oA tail |
| oNK-475 | TGGTGAGAACACATGCACAACCTG AGAGCATCTATGGCAGAACATGAG  | 5' <i>Anr</i> icA with <i>Anpyr</i> oA tail |
| oNK-356 | TGGATGAACTCTGCAATCAGGCTC                           | 5' nested of <i>Anr</i> icA                 |
| oNK-357 | ATGCTTGCGTAAACCAAGCAAGTC                           | 3' nested of <i>Anr</i> icA                 |
| oNK-397 | AACGCAACGCAAAGGATAGCGAGC                           | 5' flanking region of <i>Ansf</i> gA        |
| oNK-398 | ACTTCTGCAGTCGGAATTGGCCTG AGAGAAAGATCGACGGTGGGAGAG  | 3' <i>Ansf</i> gA with <i>Anpyr</i> oA tail |
| oNK-399 | TGGTGAGAACACATGCACAACCTG TTGACCGGACCATACACCTCGCAC  | 5' <i>Ansf</i> gA with <i>Anpyr</i> oA tail |
| oNK-400 | AGCAGACGTTCACTCAGAGCCACC                           | 3' flanking region of <i>Ansf</i> gA        |
| oNK-401 | AATTTGGTAGTTGCGCCTACGGC                            | 5' nested of <i>Ansf</i> gA                 |
| oNK-402 | GTCGCAGAGGCGTAGCTCTACAG                            | 3' nested of <i>Ansf</i> gA                 |
| oNK-412 | TCACATCTCGATGATTGGTTGAATG                          | 5' flanking region of <i>Anfl</i> bA        |
| oNK-413 | ACTTCTGCAGTCGGAATTGGCCTG TGGCATTGAAGAGTGCAGGTCGGAG | 3' <i>Anfl</i> bA with <i>Anpyr</i> oA tail |
| oNK-414 | TGGTGAGAACACATGCACAACCTG ACAGTAATTATCTACACGCGTGATG | 5' <i>Anfl</i> bA with <i>Anpyr</i> oA tail |
| oNK-415 | ACTACTCACTACCTAACTTGACTG                           | 3' flanking region of <i>Anfl</i> bA        |
| oNK-416 | TGGTTGAATGGTGTATGGGTCAGC                           | 5' nested of <i>Anfl</i> bA                 |
| oNK-417 | TGTAGCTTTCGTTTCAGGCGATAGTG                         | 3' nested of <i>Anfl</i> bA                 |
| oNK-870 | ATATGGATCCTGCTTGGATGACAAGGTTTGTATCC                | 5' ge- <i>Anr</i> icA with <i>Bam</i> HI    |
| oNK-871 | ATATGCGGCCGCACCTACATACTGCGTATGTCTGCTG              | 3' ge- <i>Anr</i> icA with <i>Not</i> I     |
| oJH-83  | GGATGTATCGTGACTGGCCTTCGG                           | 5' <i>Afpyr</i> G marker                    |
| oJH-86  | TAATTCGCGGCATACGGTGTCTAA                           | 3' <i>Afpyr</i> G marker                    |

|         |                                                     |                                             |
|---------|-----------------------------------------------------|---------------------------------------------|
| oNK-395 | ATTCATGGGTGCTGTGCGAAAGG                             | 5' <i>AnpyroA</i> marker                    |
| oNK-396 | TTGCATCGCATAGCATTGCATTGC                            | 3' <i>AnpyroA</i> marker                    |
| oNK-432 | AGCGTCGGCTCGTCGCTCTCTCA                             | 5' flanking region of <i>AnganB</i>         |
| oNK-433 | CTGCGCAGGCCGCCAACATCAAACATGCTGT                     | 3' <i>AnganB</i> <sup>Q208L</sup>           |
| oNK-434 | GCGGCCTGCGCAGCGAGAGGAAAAAGTGGATTC                   | 5' <i>AnganB</i> <sup>Q208L</sup>           |
| oNK-435 | TGACCACTCCGGCACTGGCATATG                            | 3' flanking region of <i>AnganB</i>         |
| oNK-436 | ATATCCCGGGTCTTGCTCCGCAATCTGTATCCTG                  | 5' nested of <i>AnganB</i> with <i>SmaI</i> |
| oNK-437 | ATATGCGGCCGCTCGAATACCTGCCGGAACCTGC                  | 3' nested of <i>AnganB</i> with <i>NotI</i> |
| oNK-540 | TGTTCTGGATGATAGTCTTCTAG                             | 5' flanking region of <i>AnrgsA</i>         |
| oNK-541 | ACTTCTGCAGTCGGAATTGGCCTG TTGACTGAACGTATCTTAAGAGTG   | 3' <i>AnrgsA</i> with <i>AnpyroA</i> tail   |
| oNK-542 | TGGTGAGAACACATGCACAACCTTG ACGTCGTGGCACAATCTTCCGGTG  | 5' <i>AnrgsA</i> with <i>AnpyroA</i> tail   |
| oNK-543 | AGCTCCAATACACTGCATGTGGAG                            | 3' flanking region of <i>AnrgsA</i>         |
| oNK-544 | TGTCGCCGACCACTACTACTACC                             | 5' nested of <i>AnrgsA</i>                  |
| oNK-545 | TTGAACTATCTTAACGAGGGTGAC                            | 3' nested of <i>AnrgsA</i>                  |
| oNK-562 | TCATGTGCATTATGGAGCGTATTAG                           | 5' flanking region of <i>AnrgsB</i>         |
| oNK-563 | ACTTCTGCAGTCGGAATTGGCCTG TGCTCTAGCAAGCTCGTGATGTTG   | 3' <i>AnrgsB</i> with <i>AnpyroA</i> tail   |
| oNK-564 | TGGTGAGAACACATGCACAACCTTG TGCCTTGAATCAGCATACAATCCAC | 5' <i>AnrgsB</i> with <i>AnpyroA</i> tail   |
| oNK-567 | ACCTAGCTCTCTTCCAACGATGATC                           | 3' flanking region of <i>AnrgsB</i>         |
| oNK-605 | TCTATTCAAGTTCTCAAACCTGCATC                          | 5' nested of <i>AnrgsB</i>                  |
| oNK-606 | AGCCCGCTGTGGCTCCGTAATCTC                            | 3' nested of <i>AnrgsB</i>                  |
| oNK-568 | ACATGCTTGACAAGACGAGAACTG                            | 5' flanking region of <i>AnrgsC</i>         |
| oNK-569 | ACTTCTGCAGTCGGAATTGGCCTG TCCTCACCAAATCATATGCACAGC   | 3' <i>AnrgsC</i> with <i>AnpyroA</i> tail   |
| oNK-603 | TGGTGAGAACACATGCACAACCTTG ACTGTGAGTATGCTGCTTTTTATG  | 5' <i>AnrgsC</i> with <i>AnpyroA</i> tail   |
| oNK-604 | TACCTCGCTGGCTTCGAGTGGGAC                            | 3' flanking region of <i>AnrgsC</i>         |
| oNK-607 | TCAAGAGCCTGCTGGTAGATATGG                            | 5' nested of <i>AnrgsC</i>                  |
| oNK-608 | AGAGTGCTGGACACGTCTCATTGT                            | 3' nested of <i>AnrgsC</i>                  |
| oNK-14  | ATATGAATTCATGAGTGCGGCGAACTATCCAG                    | 5' <i>AnvosA</i> probe                      |
| oNK-15  | ATATGTCGACTCACCGAGGAGTCCGTTTCGCTG                   | 3' <i>AnvosA</i> probe                      |
| oNK-554 | ATATAAGCTTATGGCCACTCTCTTTCACTCCGTC                  | 5' <i>AnfluG</i> with <i>HindIII</i>        |
| oNK-555 | ATATGCGGCCGCATACCTCTCCACAAGCCACTTCCTG               | 3' <i>AnfluG</i> with <i>NotI</i>           |
| oNK-556 | ATATAAGCTTATGCGAAATCAGTCCAGCCTGTCC                  | 5' <i>Anb1A</i> with <i>HindIII</i>         |
| oNK-557 | ATATGCGGCCGCTTCATCCCAGCCGTCAGGCTCAT                 | 3' <i>Anb1A</i> with <i>NotI</i>            |
| oNK-875 | ATATCATATGCCTACTCTAGGAGTCTTTTGAAG                   | 5' <i>AnpkaA</i> with <i>NdeI</i>           |
| oNK-561 | ATATGCGGCCGCGAAATCGGGGAACAGGTGACCGTG                | 3' <i>AnpkaA</i> with <i>NotI</i>           |
| oNK-391 | ATATGAATTCATGAAAATACTGGGTAGATACGGAG                 | 5' <i>AfricA</i> with <i>EcoRI</i>          |
| oNK-392 | ATATGCGGCCGCCCTCTCAAAAAGCACGAATAACCTC               | 3' <i>AfricA</i> with <i>NotI</i>           |

|         |                                                     |                                          |
|---------|-----------------------------------------------------|------------------------------------------|
| oNK-358 | TGGCGATATGGTCAAGCTACAAGG                            | 5' flanking region of <i>Africa</i>      |
| oNK-359 | TTTGTAGGCTTTGGGCTGTTCAAA TGTGAGAGTCAGGACATACGCATC   | 3' <i>Africa</i> with <i>AnpyrG</i> tail |
| oNK-360 | CTGATCTACCCCTTGGAACGCAGCA TGAGAGGTAAGACAAAGTTCCTAC  | 5' <i>Africa</i> with <i>AnpyrG</i> tail |
| oNK-361 | ACACCAGGACTGACTCTGAGTATG                            | 3' flanking region of <i>Africa</i>      |
| oNK-933 | AGTCAAATGAGGCCTCTAAACTGGTCA ATCATCGAGGCATACCTGCCATC | 3' <i>Africa</i> with <i>AnargB</i> tail |
| oNK-934 | AGCCAAGGTAGATCCAGGCCTAACACA ACAACACCTTGGAGCTATCAGTC | 5' <i>Africa</i> with <i>AnargB</i> tail |
| oNK-362 | CAGGCCAAGCTGAACATGCGAATG                            | 5' nested of <i>Africa</i>               |
| oNK-363 | AGTTGTAGTCGCTAATCTTCTTCTC                           | 3' nested of <i>Africa</i>               |
| oBS-08  | GCAATGTAAAGCTAACGTGCGTG                             | 5' <i>AnpyrG</i> marker                  |
| oBS-09  | TGCCTTTAAGCTTCGGGTAGAG                              | 3' <i>AnpyrG</i> marker                  |
| oNK-104 | ACACTTCAAAGGAGCGACGCTGTTG                           | 5' <i>AnargB</i> marker                  |
| oNK-105 | TCGACCTACAGCCATTGCGAAACCTC                          | 3' <i>AnargB</i> marker                  |
| oNK-868 | ATATGGATCCTGGCGATATGGTCAAGCTACAAGG                  | 5' ge- <i>Africa</i> with <i>Bam</i> HI  |
| oNK-869 | ATATGCGGCCGCGCACACCAGGACTGACTCTGAGTATG              | 3' ge- <i>Africa</i> with <i>Nor</i> I   |
| oNK-594 | TGAGATCCCAGGGTAATATGTCTG                            | 5' <i>AfbrlA</i> probe                   |
| oNK-595 | TACTCATCCCATTCCATACTGATC                            | 3' <i>AfbrlA</i> probe                   |
| oHS-382 | AATTGTCGACTCATGGCTACTGACTGGCAGCCC                   | 5' <i>AfabaA</i> probe                   |
| oHS-383 | AATT GCGGCCGC TCATTGGACCGCCTCAGTTGC                 | 3' <i>AfabaA</i> probe                   |
| oTL-7   | ATATGGTACCATGTTTCGCTCAACCATTTCGATC                  | 5' <i>AfwetA</i> probe                   |
| oTL-8   | ATATGCGGCCGCGCAGAGGACAGCCTCCAGTGCTTC                | 3' <i>AfwetA</i> probe                   |

---
